# Supplementary material for: Crystal Structure and Catalytic Mechanism of CouO, a Versatile C-Methyltransferase from Streptomyces rishiriensis
Source: PLOS journal article supplement (doi:10.1371/journal.pone.0171056), 2017-02-02
Supplement: S8 (10.1371/journal.pone.0171056.s008) [file journal.pone.0171056.s008]

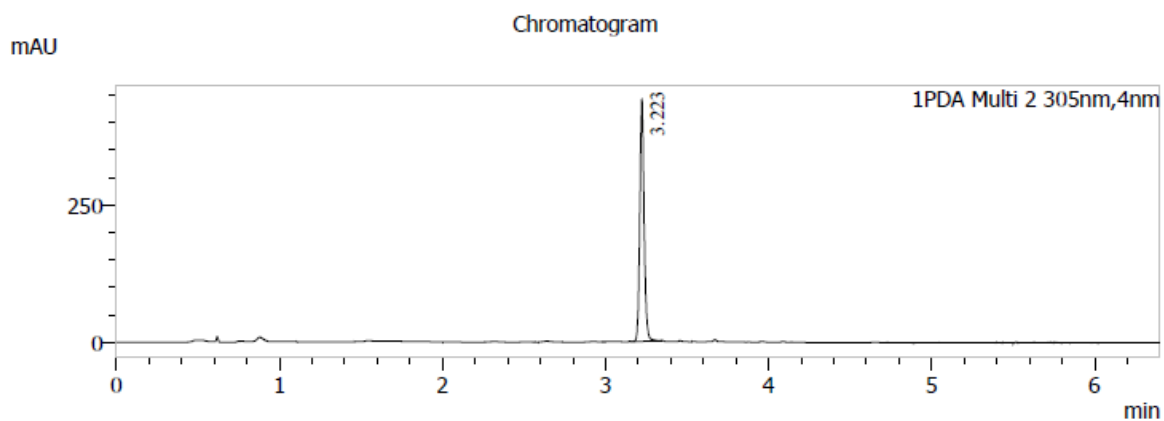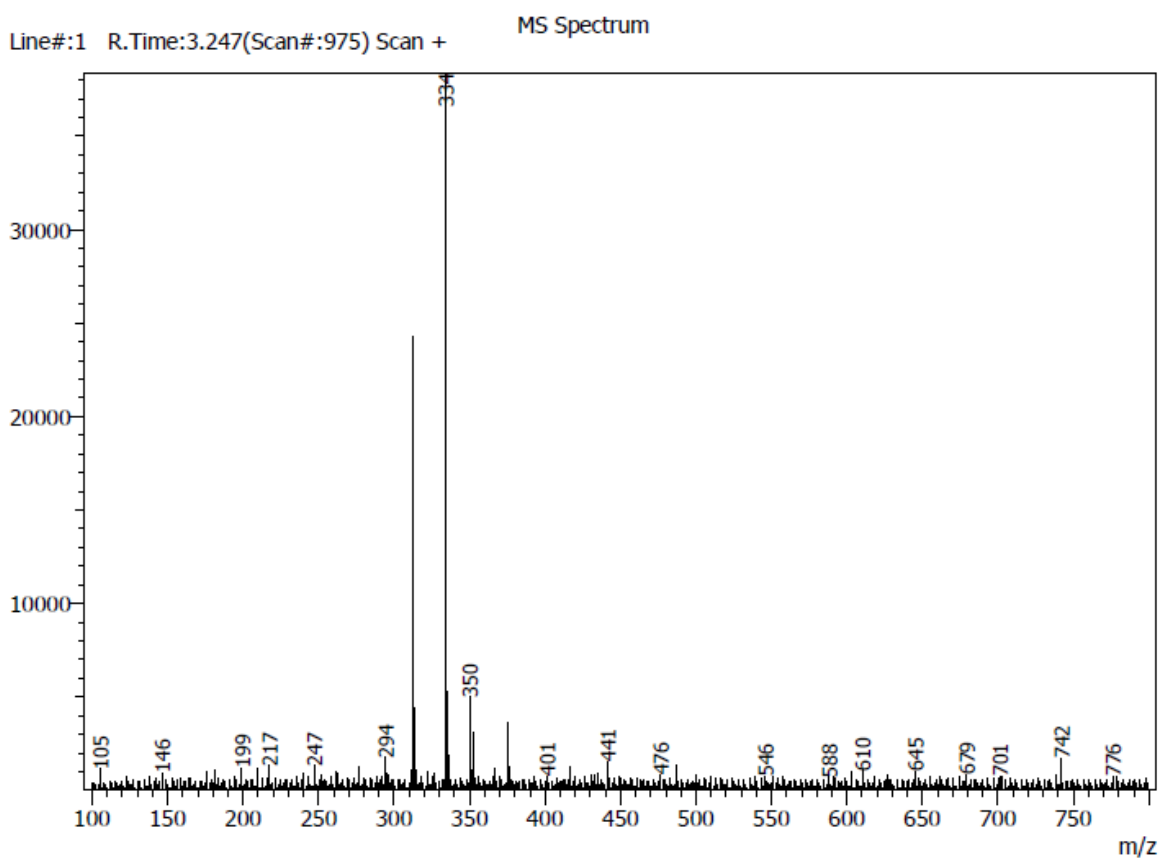

**Figure A in S1 File.** HPLC (UV) chromatogram and MS analysis of the conversion of *N*-(4,7-dihydroxy-2-oxo-2*H*-chromen-3-yl)benzamide catalyzed by the wild type enzyme.  $[M+H]^+ = 312$  m/z,  $[M+Na]^+ = 334$  m/z,  $[M+K]^+ = 350$  m/z

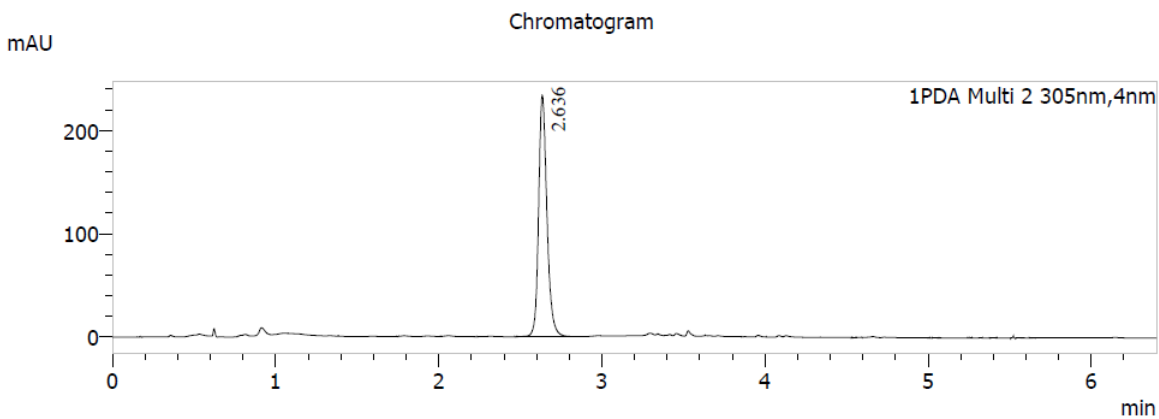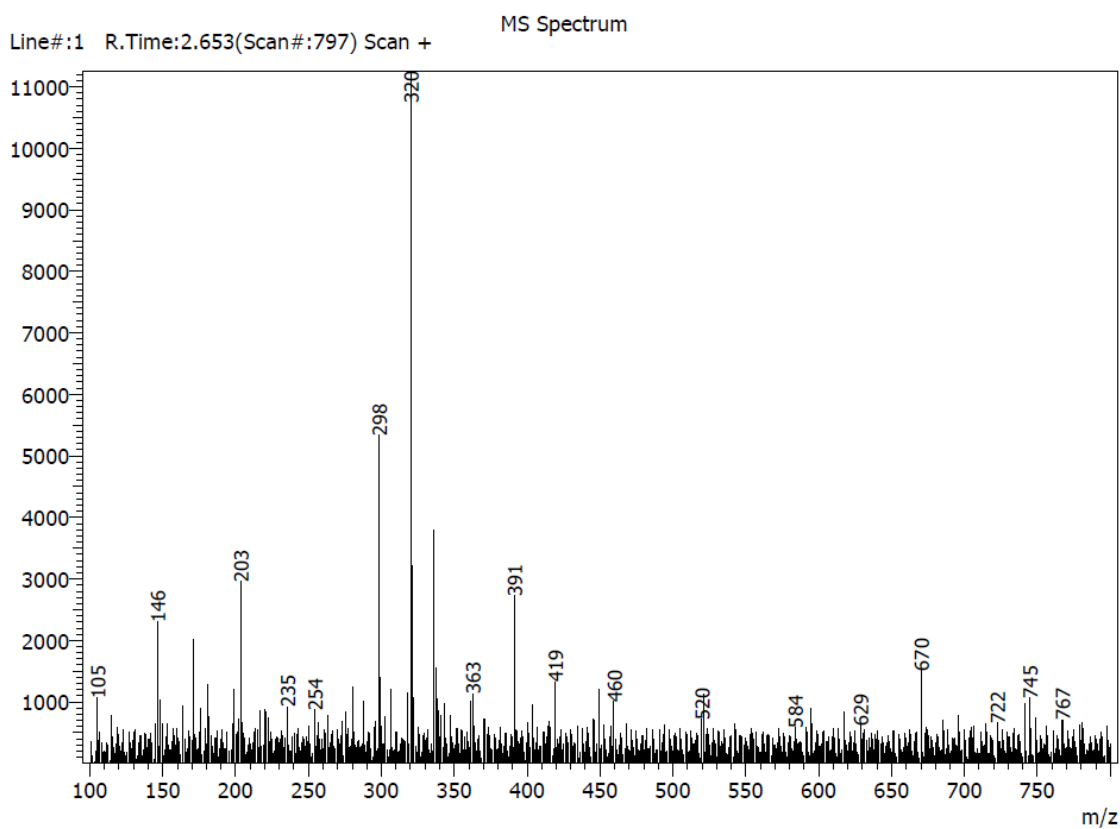

**Figure B in S1 File.** HPLC (UV) chromatogram and MS analysis of the blank reaction (50 mM sodium phosphate buffer pH 7).  $[M+H]^+ = 298$  m/z,  $[M+Na]^+ = 320$  m/z

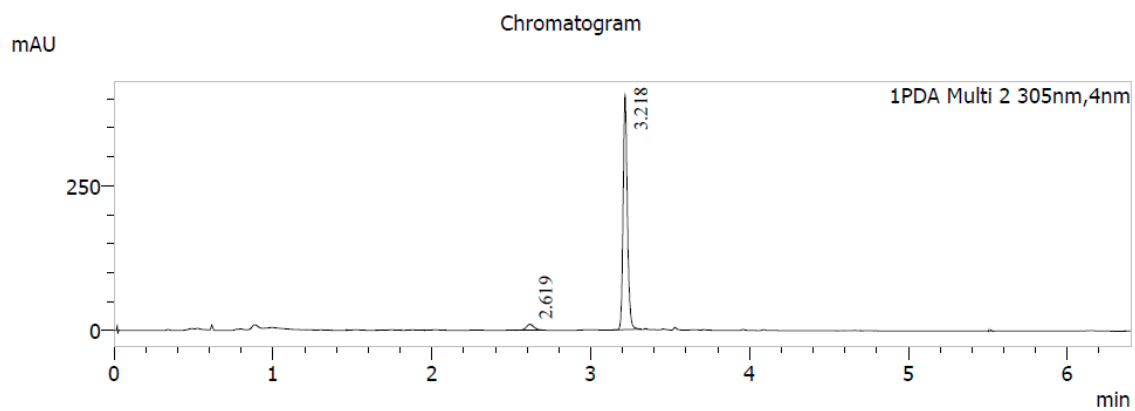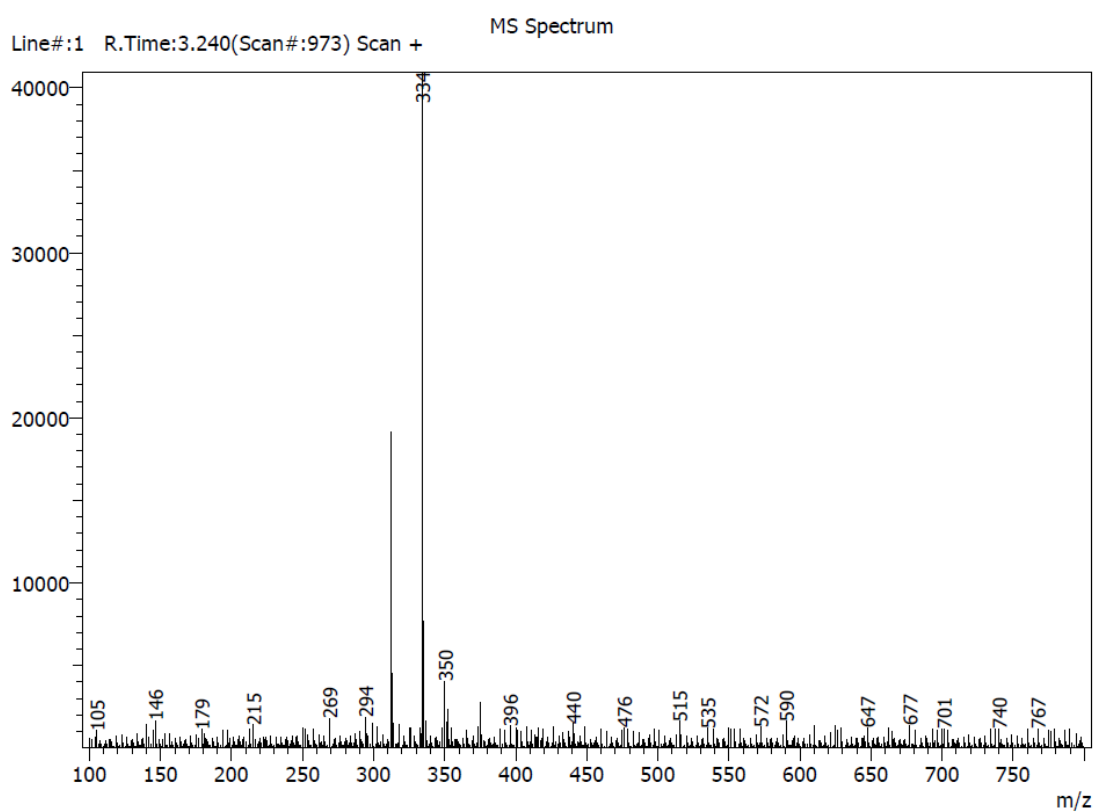

**Figure C in S1 File.** HPLC (UV) chromatogram and MS analysis of the conversion of *N*-(4,7-dihydroxy-2-oxo-2*H*-chromen-3-yl)benzamide catalyzed by the H15A variant.

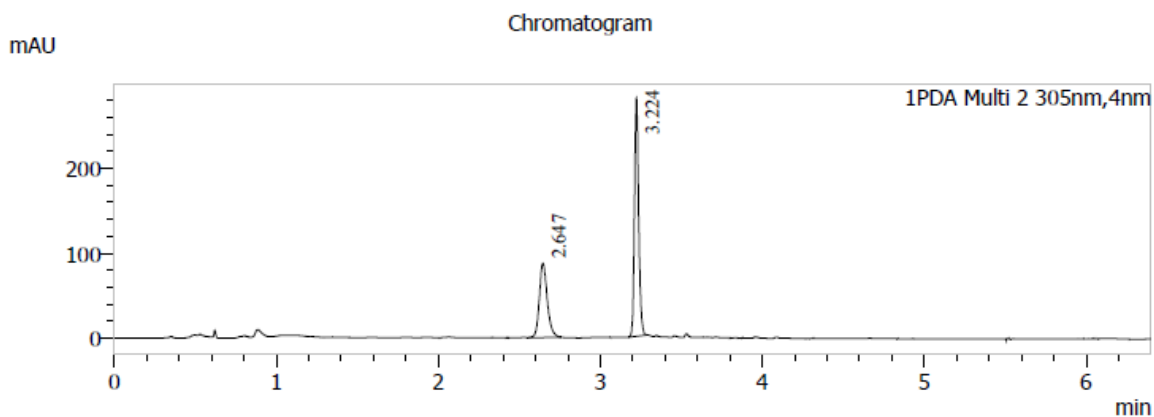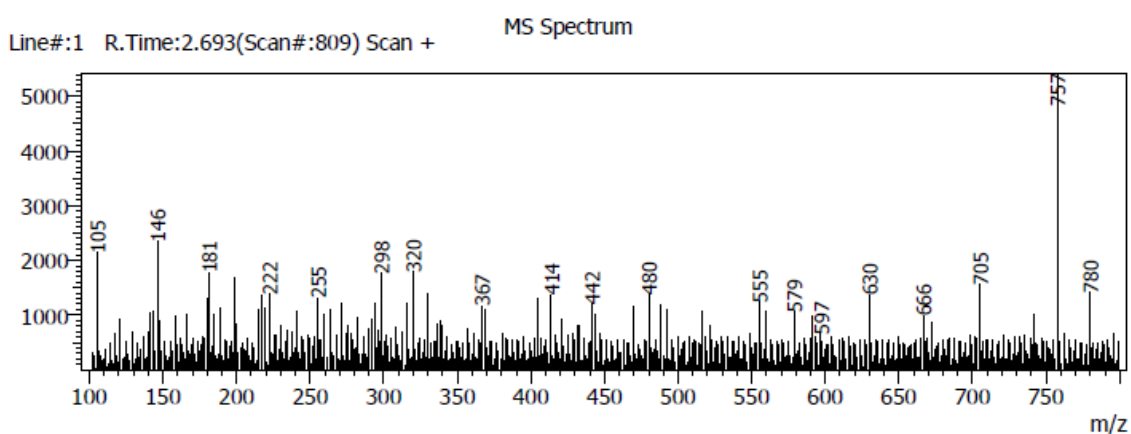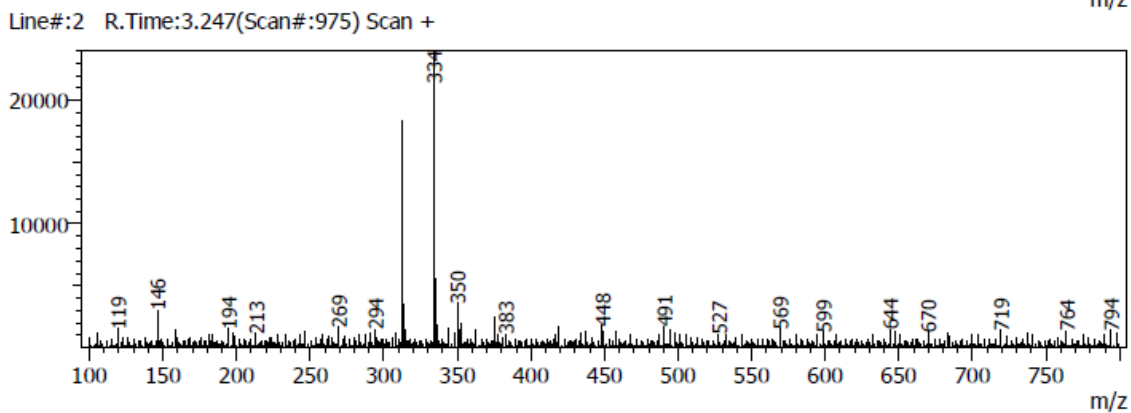

**Figure D in S1 File.** HPLC (UV) chromatogram and MS analysis of the conversion of *N*-(4,7-dihydroxy-2-oxo-2*H*-chromen-3-yl)benzamide catalyzed by the H15N variant.

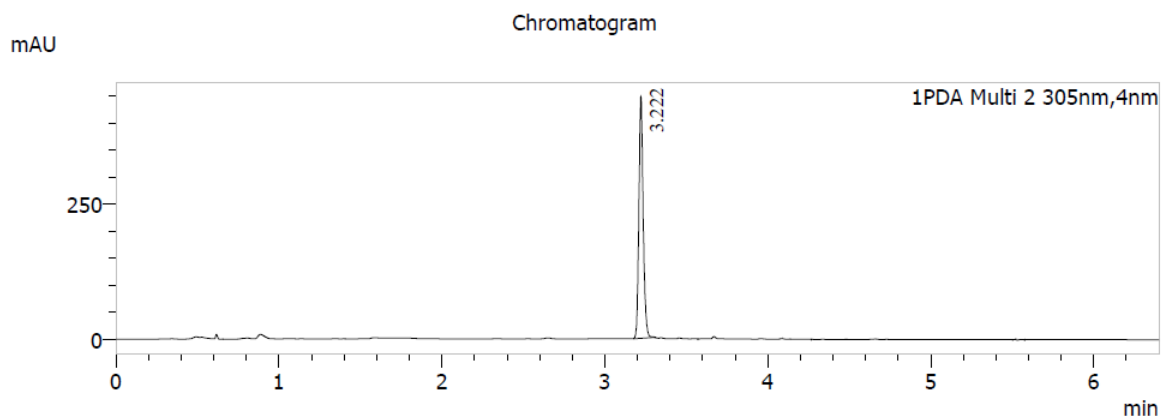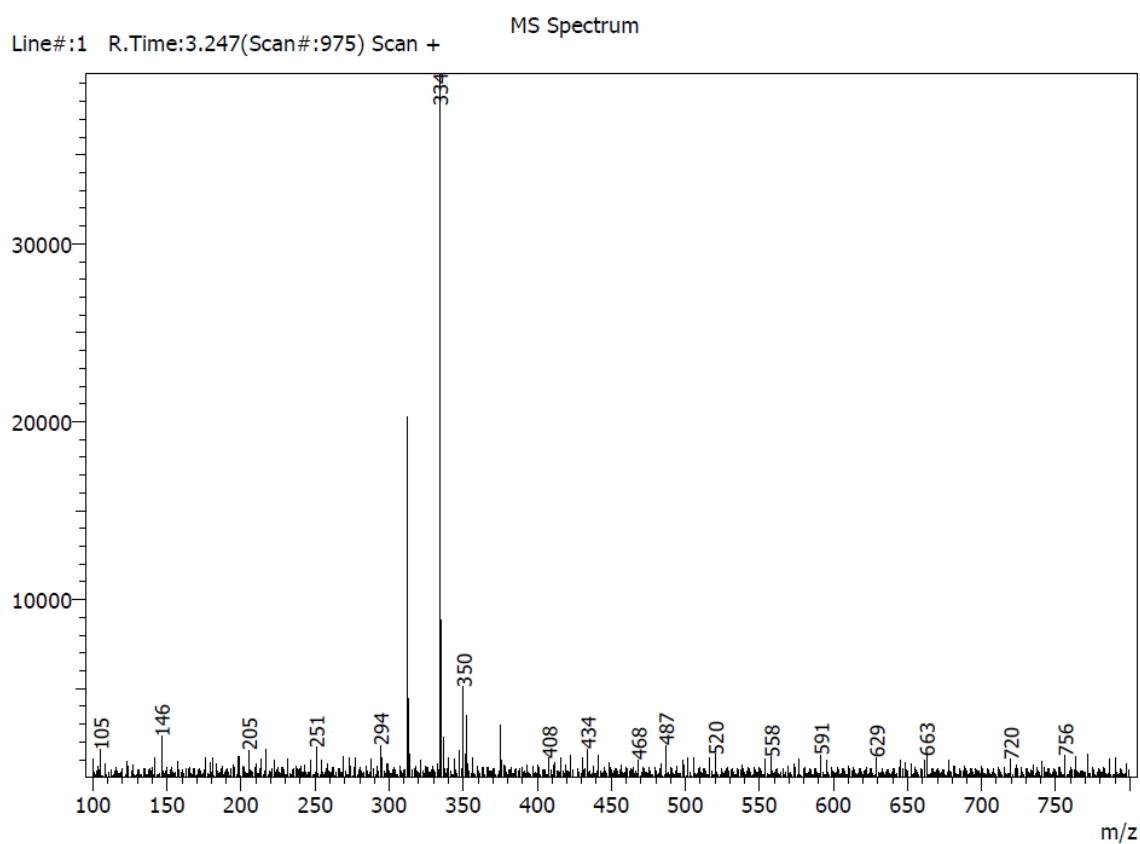

**Figure E in S1 File.** HPLC (MS) chromatogram and MS analysis of the conversion of *N*-(4,7-dihydroxy-2-oxo-2*H*-chromen-3-yl)benzamide catalyzed by the R24A variant.

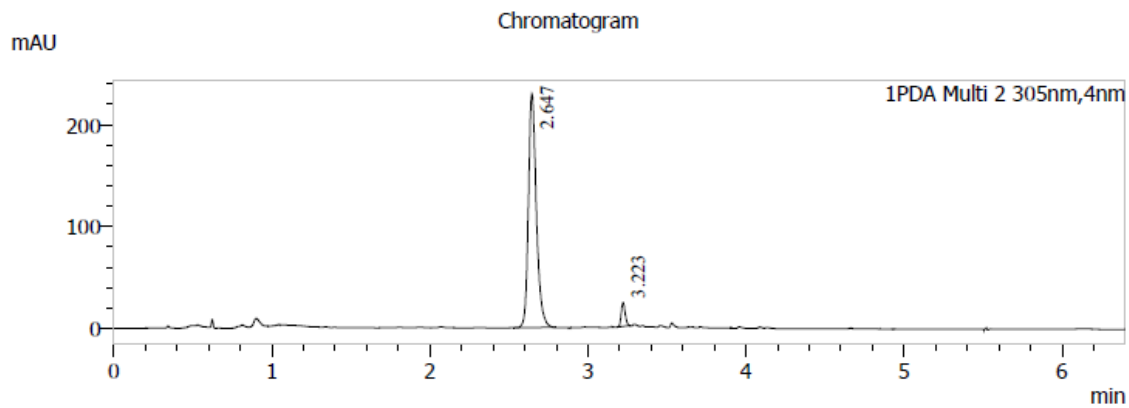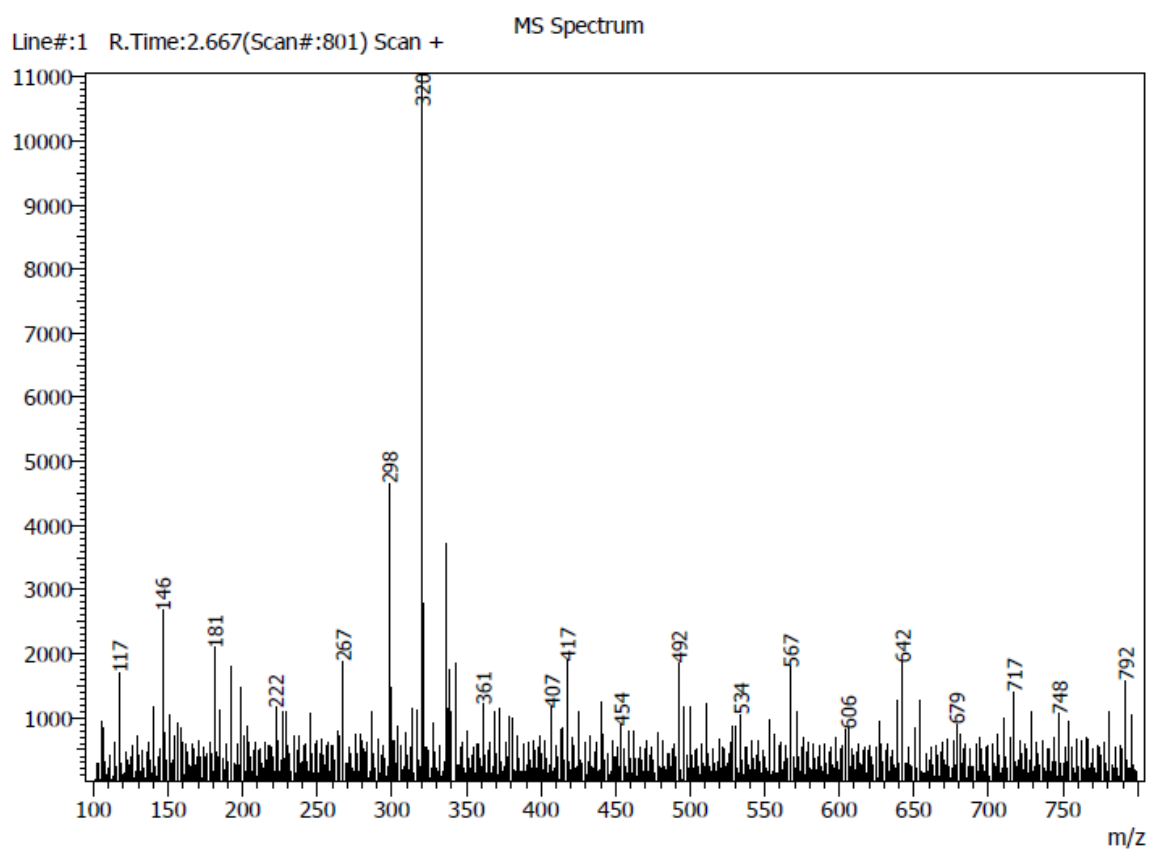

**Figure F in S1 File.** HPLC (UV) chromatogram and MS analysis of the conversion of *N*-(4,7-dihydroxy-2-oxo-2*H*-chromen-3-yl)benzamide catalyzed by the H117A variant.

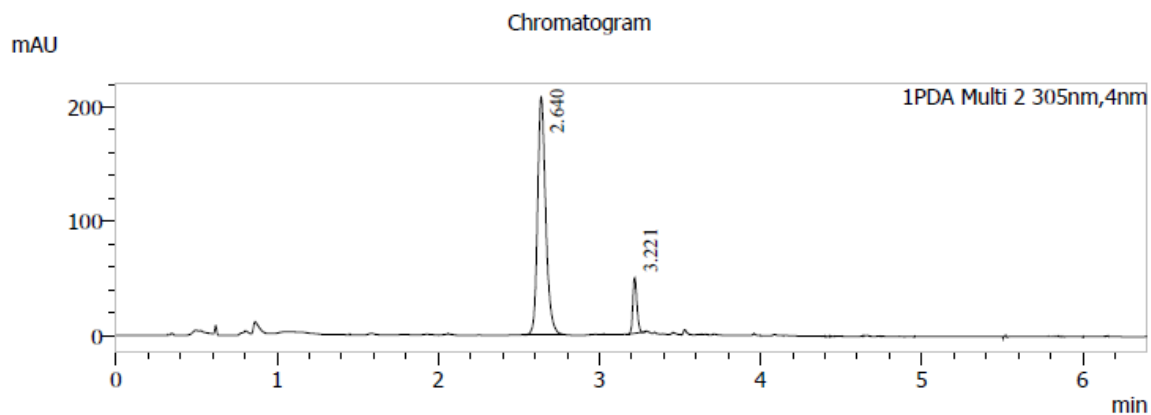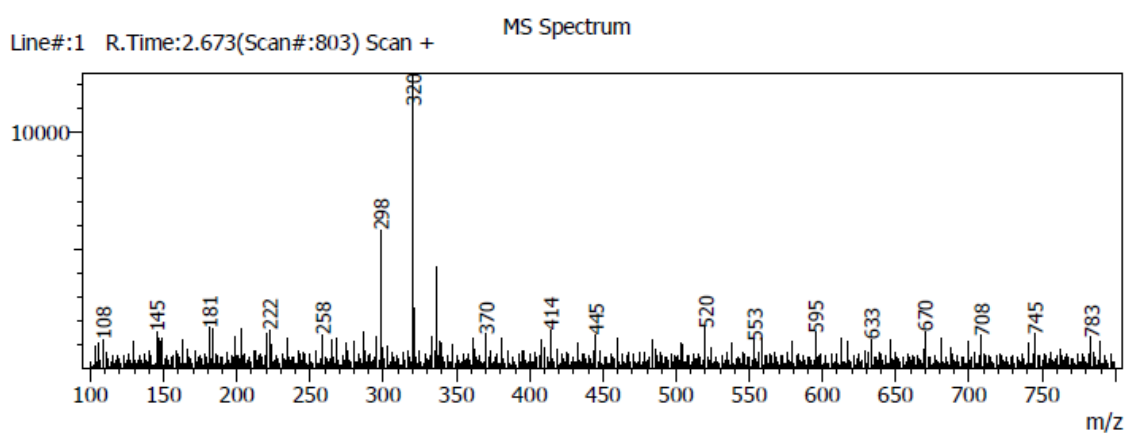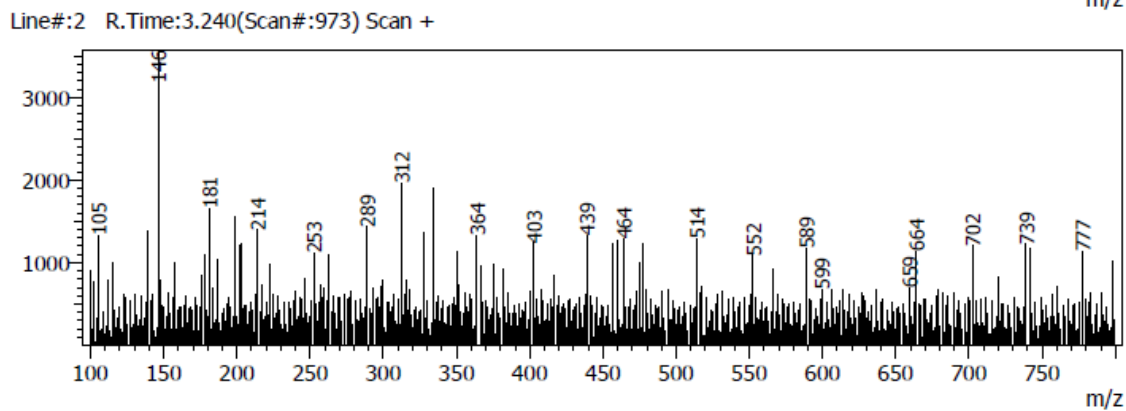

**Figure G in S1 File.** HPLC (MS) chromatogram and MS analysis of the conversion of *N*-(4,7-dihydroxy-2-oxo-2*H*-chromen-3-yl)benzamide catalyzed by the H117S variant.

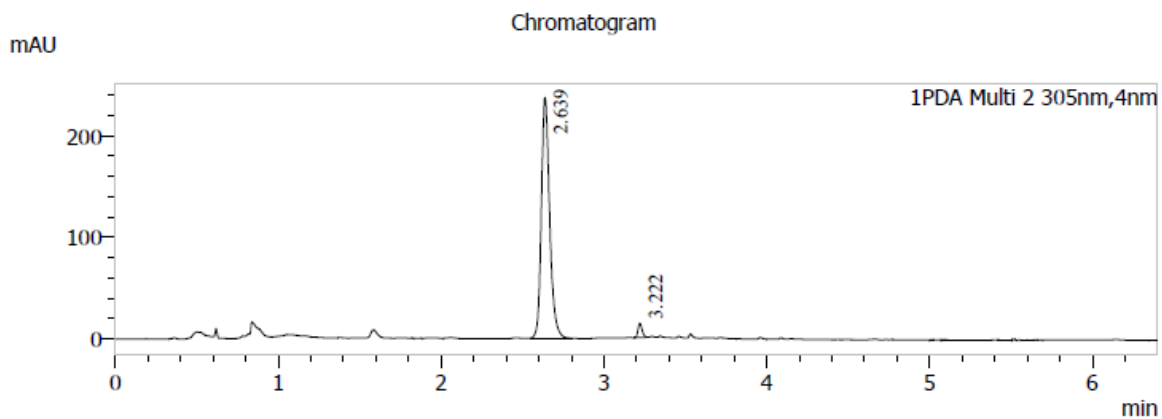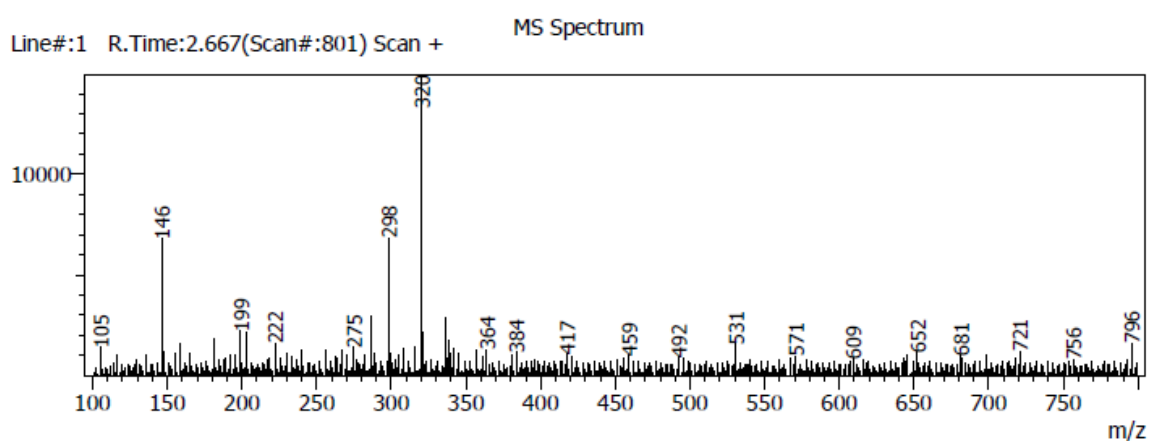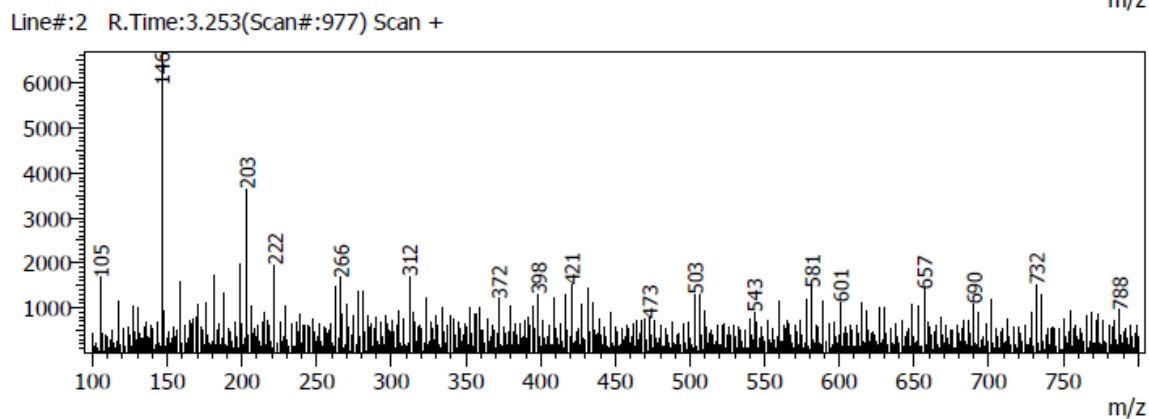

**Figure H in S1 File.** HPLC (UV) chromatogram and MS analysis of the conversion of *N*-(4,7-dihydroxy-2-oxo-2*H*-chromen-3-yl)benzamide catalyzed by the H120A variant.



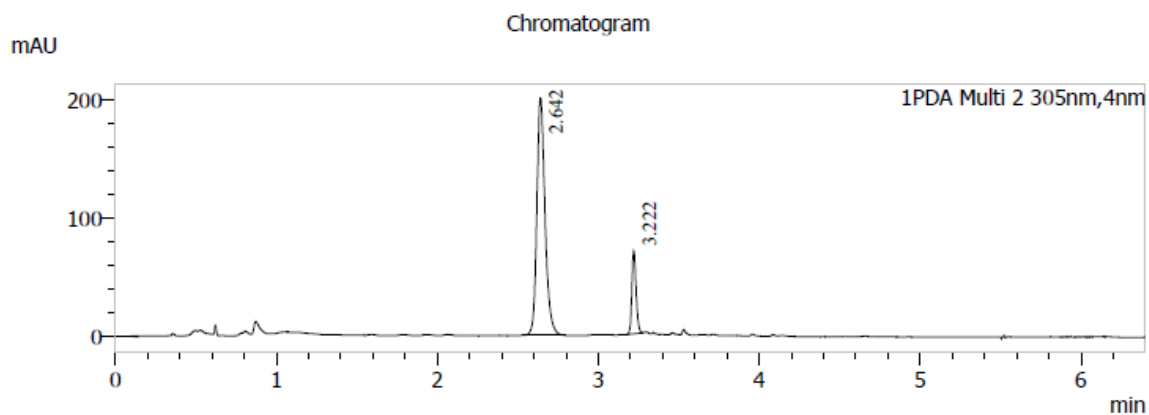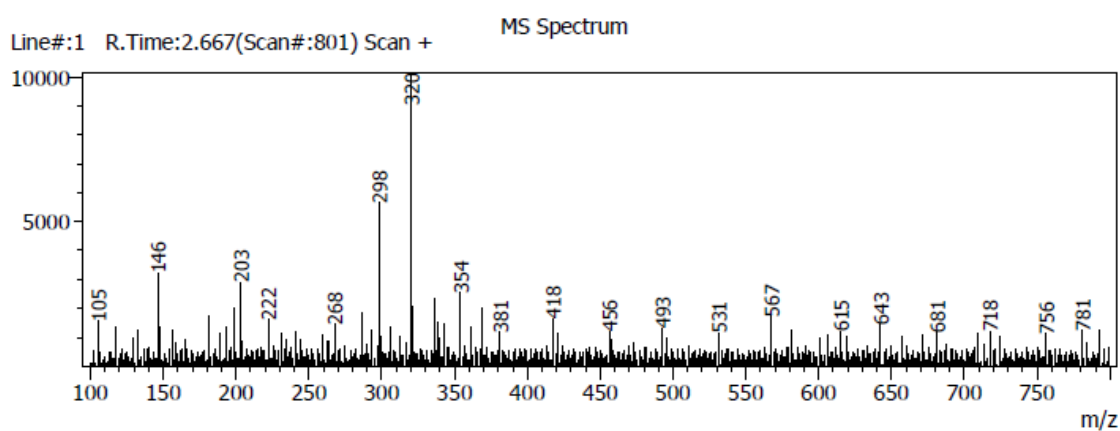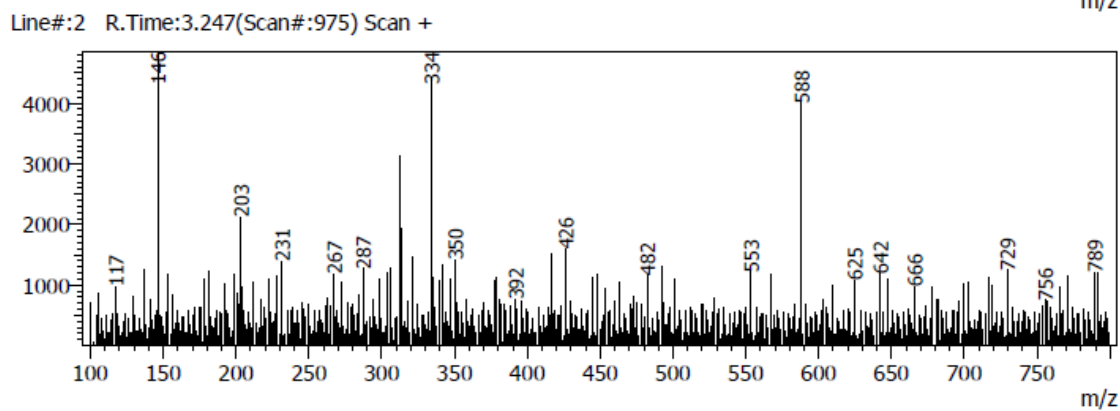

**Figure I in S1 File.** HPLC (UV) chromatogram and MS analysis of the conversion of *N*-(4,7-dihydroxy-2-oxo-2*H*-chromen-3-yl)benzamide catalyzed by the H120N variant.

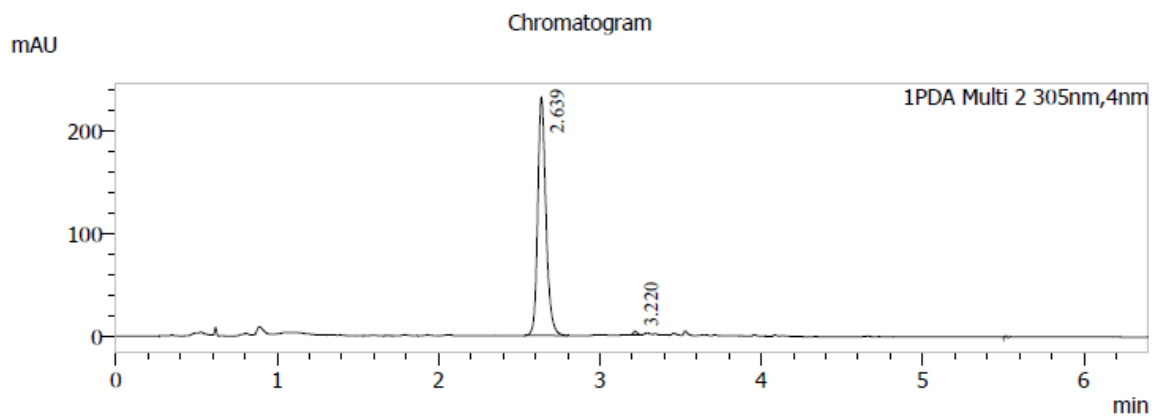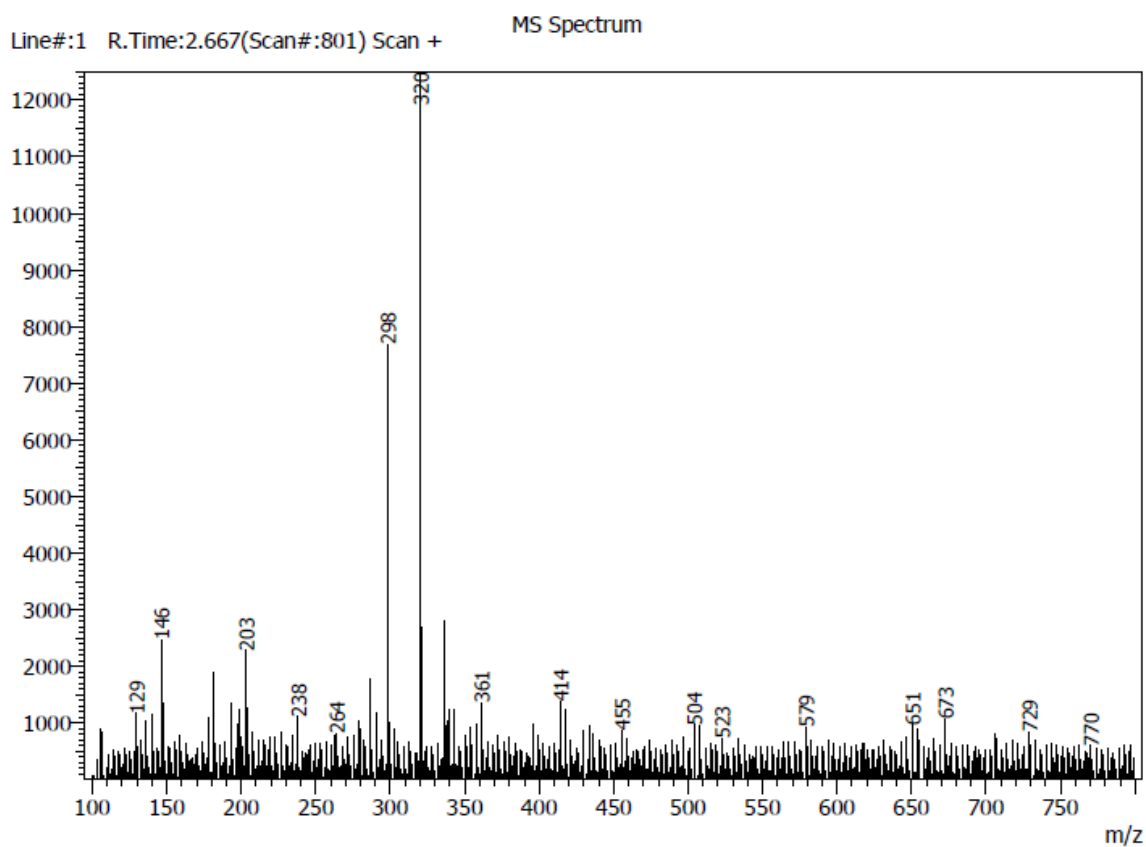

**Figure J in S1 File.** HPLC (UV) chromatogram and MS analysis of the conversion of *N*-(4,7-dihydroxy-2-oxo-2*H*-chromen-3-yl)benzamide catalyzed by the R121A variant.

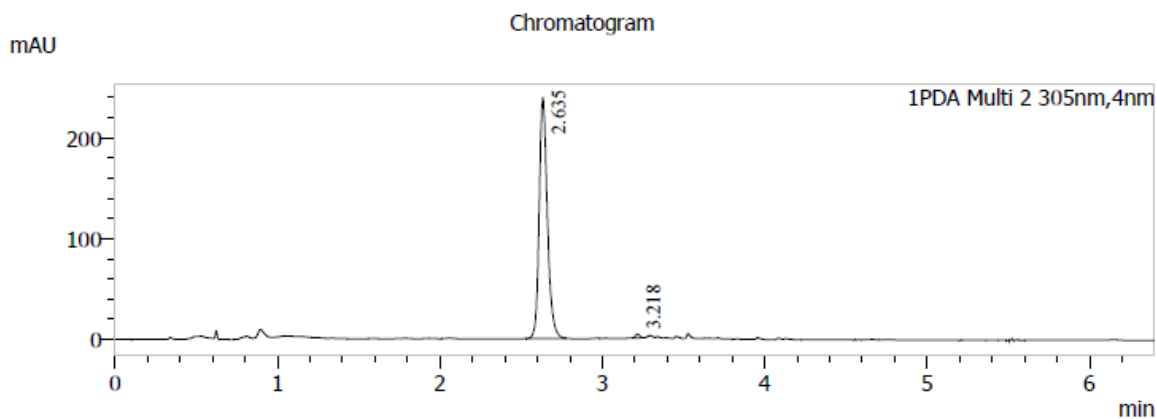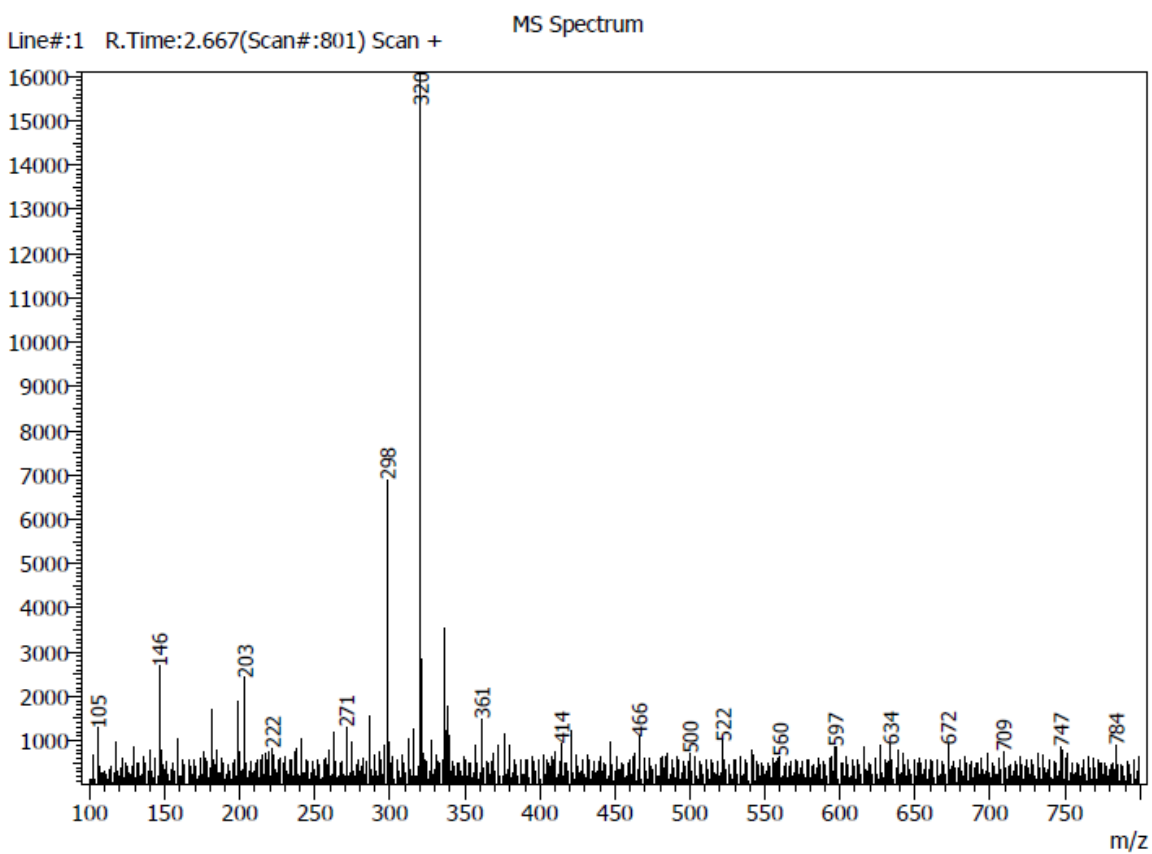

**Figure K in S1 File.** HPLC (UV) chromatogram and MS analysis of the conversion of *N*-(4,7-dihydroxy-2-oxo-2*H*-chromen-3-yl)benzamide catalyzed by the R121L variant.

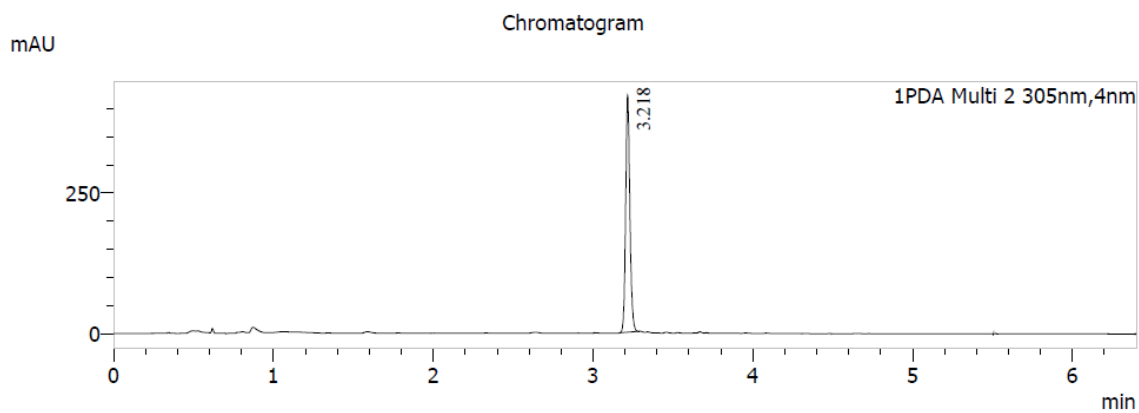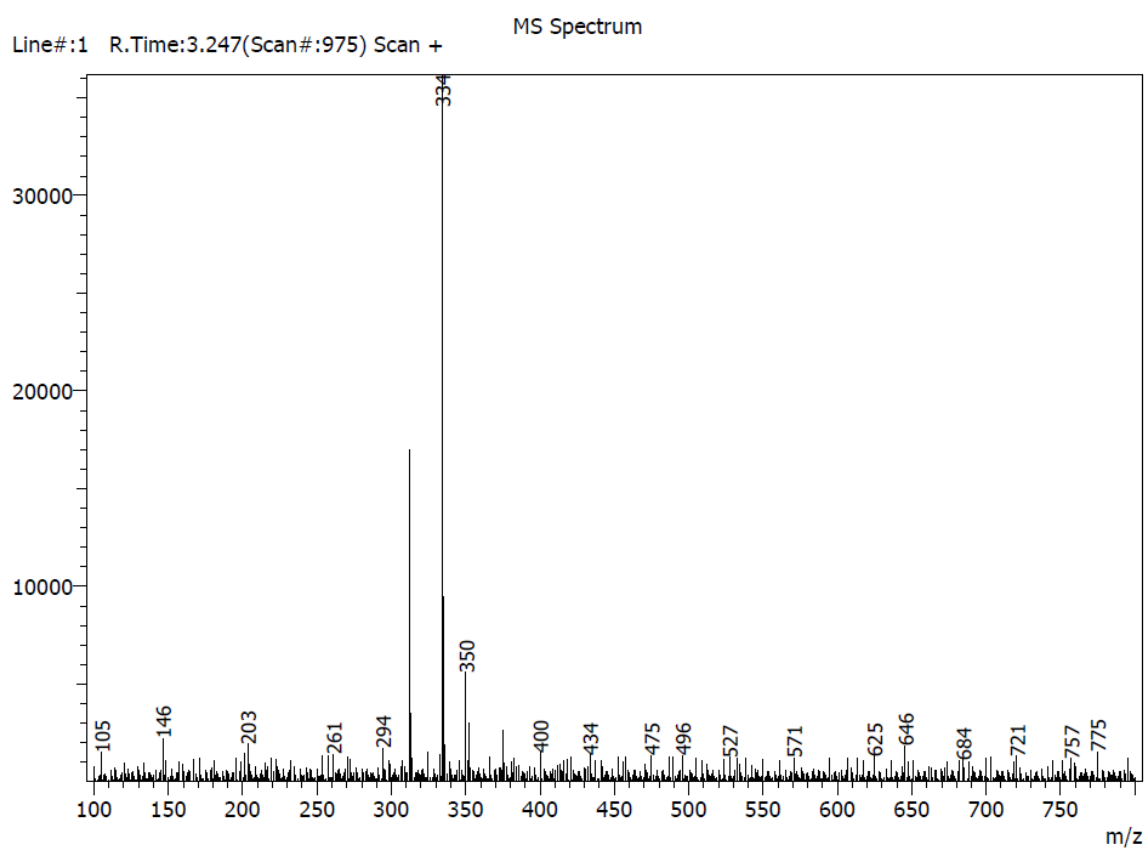

**Figure L in S1 File.** HPLC (UV) chromatogram and MS analysis of the conversion of *N*-(4,7-dihydroxy-2-oxo-2*H*-chromen-3-yl)benzamide catalyzed by the Y216F variant.
